# Supplementary material for: Facile heat reflux synthesis of blue luminescent carbon dots as optical nanoprobes for cellular imaging
Source: Royal Society of Chemistry journal article supplement (doi:10.1039/c6nj02702d), 2016-12-09
Supplement: c6nj02702d1.pdf [file c6nj02702d1.pdf]

## Supporting Information

for

### **Facile heat reflux synthesis of blue luminescent carbon dots as optical nanoprobe for cellular imaging**

Xianfeng Zhang,<sup>\*,a</sup> Jingbo Lu,<sup>b</sup> Xianqing Li,<sup>a</sup> Liucheng Chai<sup>a</sup> and  
Yuhong Jiao<sup>a</sup>

<sup>a</sup> School of Material and Chemical Engineering, Bengbu University,  
Bengbu 233030, P. R. China

<sup>b</sup>Anhui Provincial Engineering Research Center for Polysaccharide Drugs,  
Department of Pharmacy, Wannan Medical College, Wuhu 241000, P. R.  
China

*\*Corresponding author:* E-mail: zxf@bbc.edu.cn

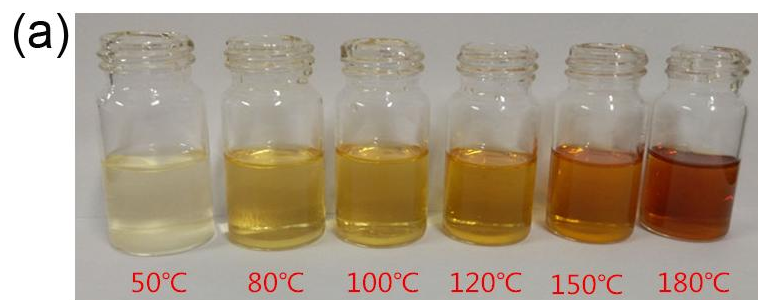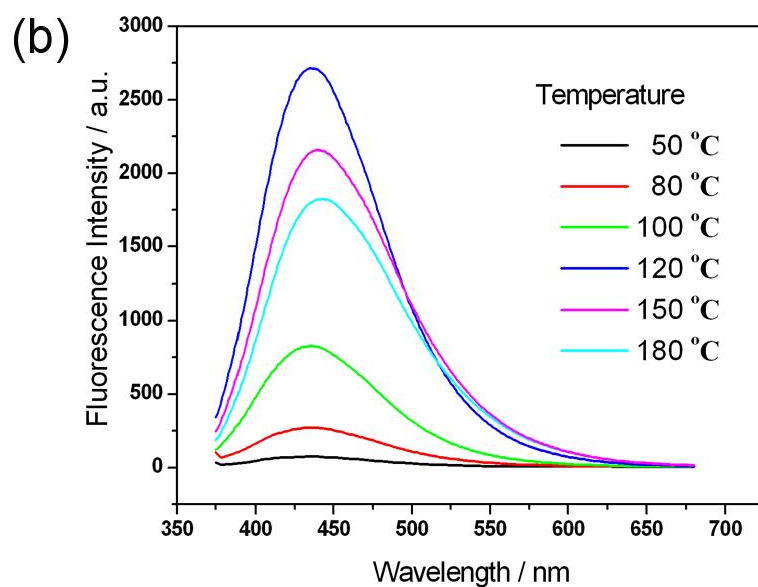

**Figure S1.** (a) Image of CD solutions after synthesis at different temperatures. (b) Fluorescence spectra of the CDs synthesized at different temperatures.

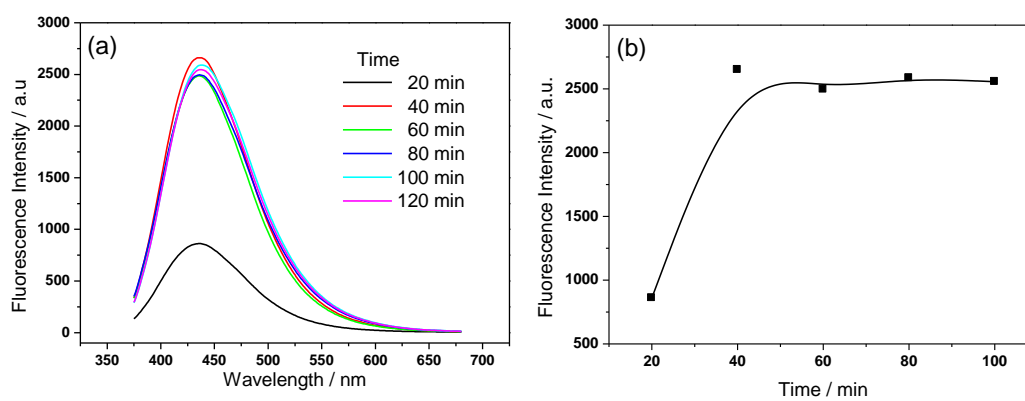

**Figure S2.** (a) Fluorescence spectra of the CDs synthesized with different reaction times. (b) Fluorescence intensity at 437 nm as a function of reaction time.

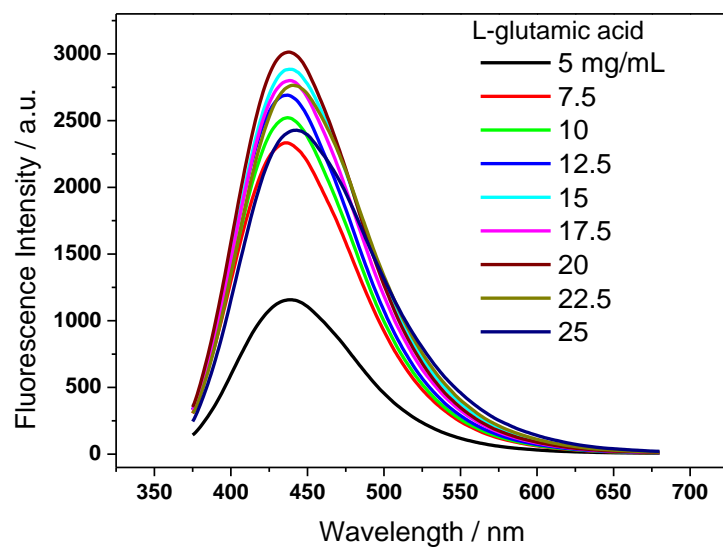

**Figure S3.** Fluorescence spectra of the CDs synthesized using different concentrations of L-glutamic acid.

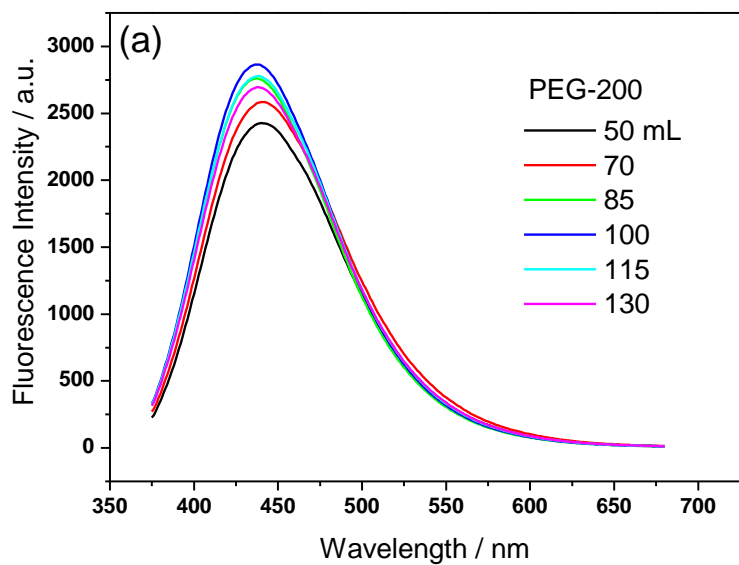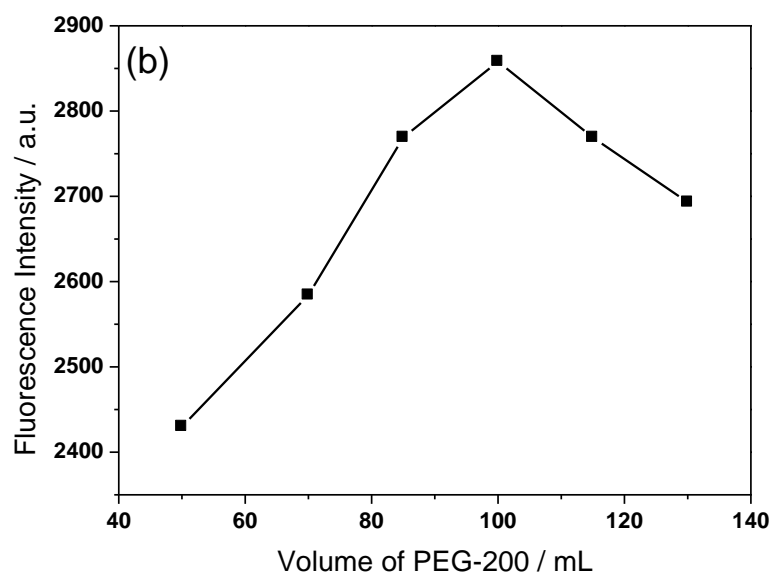

**Figure S4.** (a) Fluorescence spectra of the CDs synthesized with different amount of PEG-200 in the presence of 2.0 g L-glutamic acid. (b) The change of luminescence intensity of the CDs prepared with different amount PEG-200.

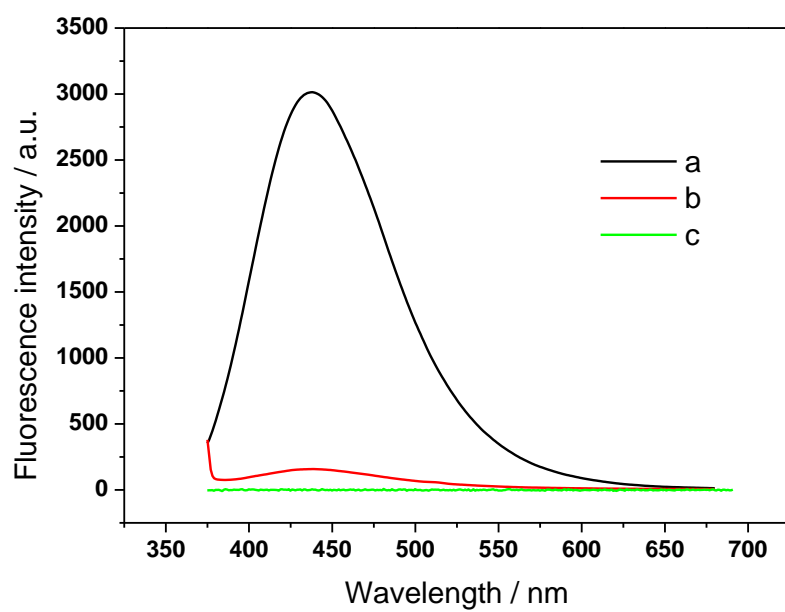

**Figure S5.** Fluorescence spectra of the CDs synthesized using (a) PEG-200 in the presence of L-glutamic acid, (b) PEG-200 in the absence of L-glutamic acid, and (c) L-glutamic acid aqueous solution, respectively.

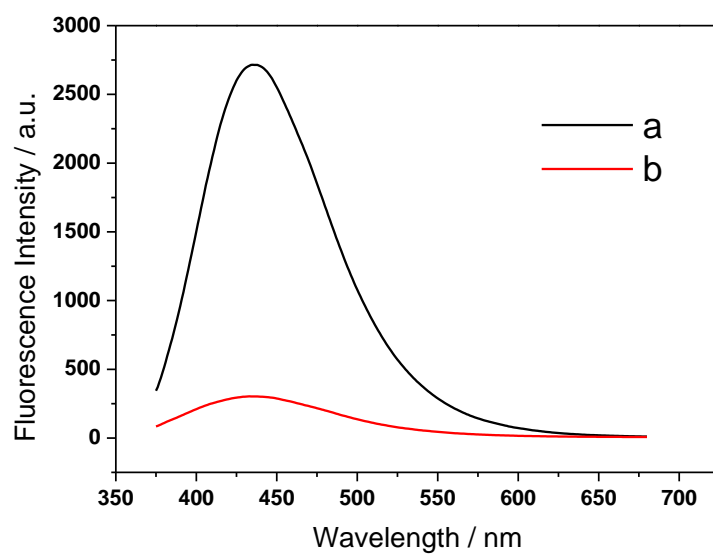

**Figure S6.** Fluorescence spectra of the CDs synthesized by different methods: (a) the direct heat reflux synthesis, and (b) the solvent-thermal method at 120 °C for 40 min.

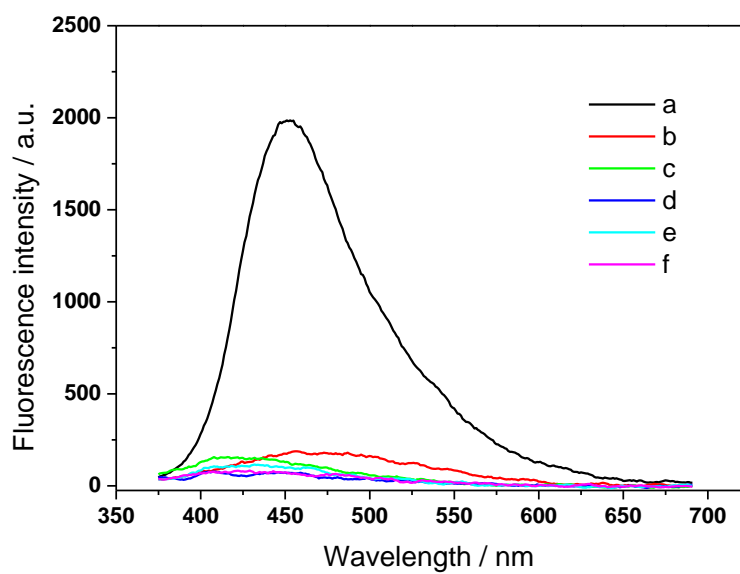

**Figure S7.** Fluorescence spectra of the CDs synthesized using the direct heat reflux synthesis (a, c, e) and the solvent-thermal method (b, d, f) with ascorbic acid (a, b), citric acid (c, d), and sucrose (e, f) as the carbon source, respectively.



**Table S1.** Quantum yield of the CD samples

| Substance        | Area    | Abs. at 360 nm | Refractive index | QY (%) |
|------------------|---------|----------------|------------------|--------|
| Quinine sulphate | 17878.8 | 0.046          | 1.33             | 54     |
| L-glutamic acid  | 2221.9  | 0.049          | 1.33             | 6.3    |

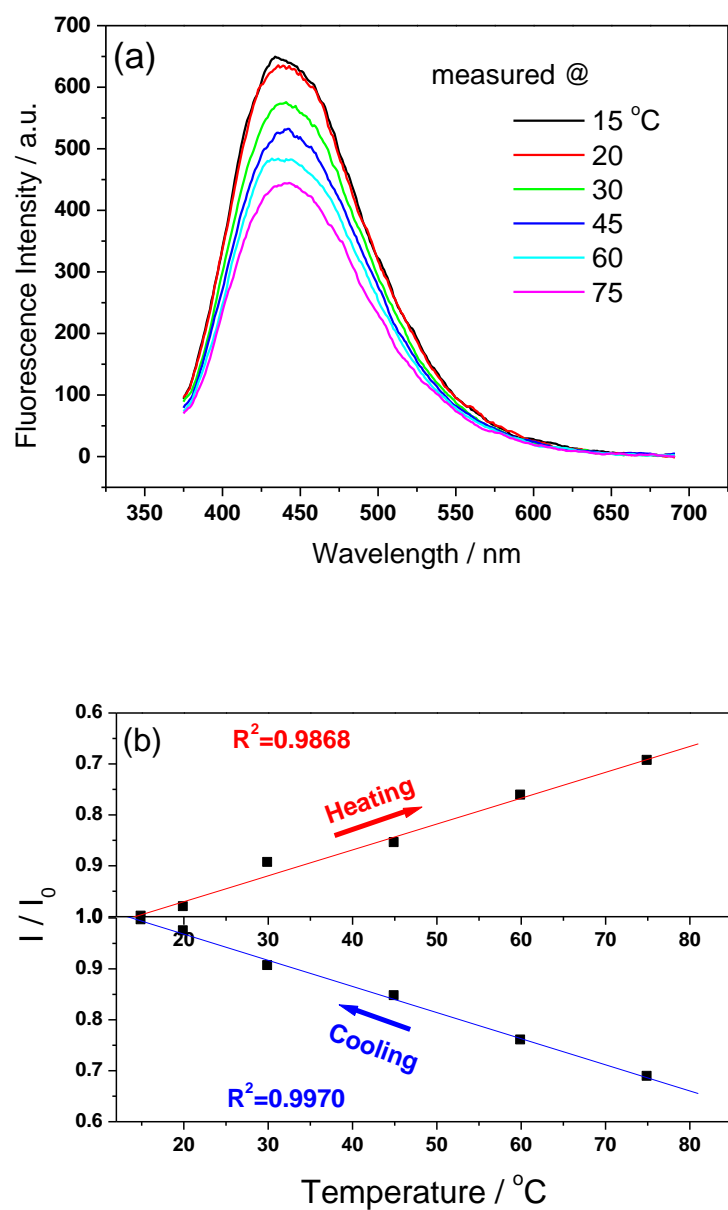

**Figure S8.** (a) Fluorescence spectra of the as-prepared CDs at various temperatures. (b) The relative fluorescence intensity ( $I/I_0$ ) of CDs as a function of temperature during heating and cooling processes (the fluorescence intensity at 15 °C as the reference).

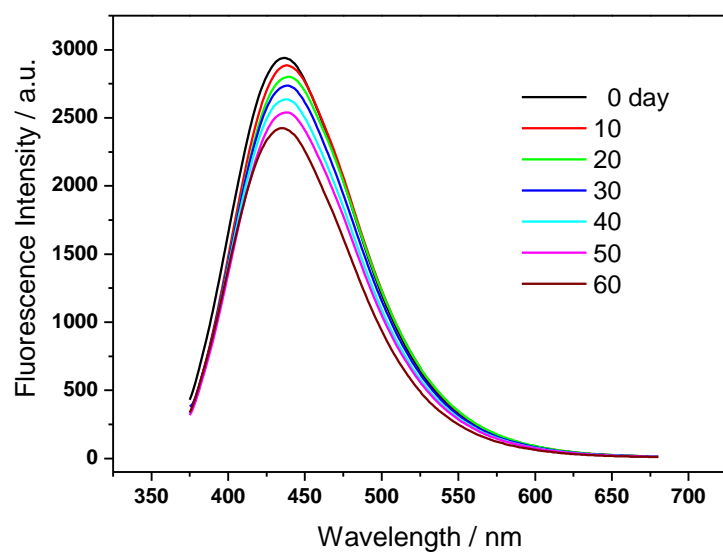

**Figure S9.** Fluorescence spectra of the synthesized CDs after different periods of storage.

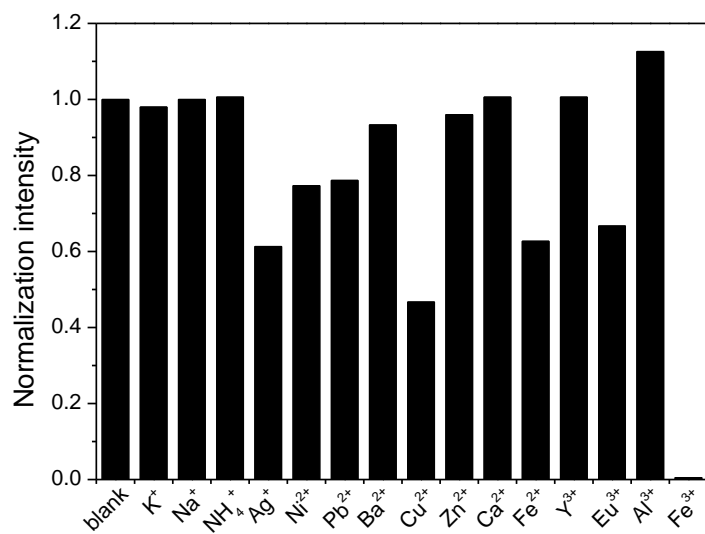

**Figure S10.** Fluorescence normalization intensities of the CDs upon the addition of different metal ions (10 mM).
